# Supplementary material for: Characteristics of acute ischemic stroke in patients with Nephrotic syndrome
Source: PubMed Central journal article supplement — Ren Fail. 2023 Dec 10;45(2):2284214. doi: 10.1080/0886022X.2023.2284214 (PMC11001311; doi:10.1080/0886022x.2023.2284214), 2023-12-10
Supplement: IRNF_A_2284214_SM8189.pdf [file IRNF_A_2284214_SM8189.pdf]

## **SUPPLEMENTARY MATERIAL**

### **Full title:**

### **Characteristics of Acute Ischemic Stroke in Patients with Nephrotic Syndrome**

**Supplementary Figure 1.** Flow of study selection. NS indicates nephrotic syndrome; IS, ischemic stroke.

**Supplementary Table 1.** The results of kidney biopsy and etiology of nephrotic syndrome.

**Supplementary Table 2.** The stages of chronic kidney disease in patients with nephrotic syndrome.

**Supplementary Table 3.** Demographic features of ischemic stroke patients with and without nephrotic syndrome.

**Supplementary Table 4.** Logistic regression for predictors of dependent functional status (modified Rankin Scale score  $\geq 3$ ) in patients with ischemic stroke following the 30-day period.

**Supplementary Table 5.** Clinical courses of ischemic stroke patients with and without nephrotic syndrome

**Supplementary Table 6.** Primary and secondary endpoints of ischemic stroke patients with and without nephrotic syndrome, specified in Keelung branch of Chang Gung Memorial Hospital, from 2016 to 2017.

**Supplementary Table 7.** Primary and secondary endpoints of ischemic stroke patients with and without nephrotic syndrome, specified in the group with estimated glomerular filtration rate  $\geq 60$  mL/min/1.73 m<sup>2</sup>.

**Supplementary Table 8.** Demographic features and clinical courses of ischemic stroke patients, with and without nephrotic syndrome.

**Supplementary Table 9.** Laboratory findings of ischemic stroke patients, with and without nephrotic syndrome.

**Supplementary Table 10.** Logistic regression for predictors of dependent functional status (modified Rankin Scale score  $\geq 3$ ) in patients with small-artery occlusion following the 30-day period.

**Supplementary Table 11.** Logistic regression for predictors of dependent functional status (modified Rankin Scale score  $\geq 3$ ) in patients with stroke of undetermined etiology following the 30-day period.

**Supplementary Table 12.** Treatment, complication and clinical outcomes of ischemic stroke patients, with and without nephrotic syndrome.

**Supplementary Figure 1.** Flow of study selection. NS indicates nephrotic syndrome; IS, ischemic stroke.

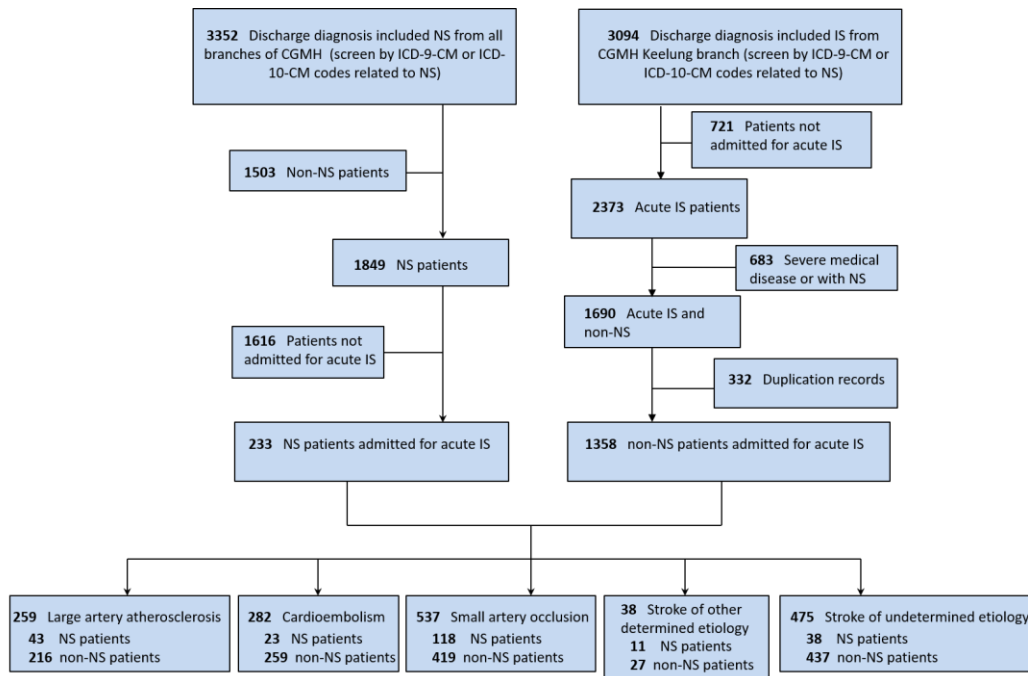

**Supplementary Table 1.** The results of kidney biopsy and etiology of nephrotic syndrome.

|                                                    | Total nephrotic syndrome patients<br>(n=233) |
|----------------------------------------------------|----------------------------------------------|
| With kidney biopsy (n=34)                          |                                              |
| Membranous glomerulonephritis                      | 16 (6.9%)                                    |
| Minimal change nephropathy                         | 1 (0.4%)                                     |
| Focal segmental glomerulosclerosis                 | 1 (0.4%)                                     |
| Diffuse mesangial proliferative glomerulonephritis | 1 (0.4%)                                     |
| IgM nephropathy                                    | 1 (0.4%)                                     |
| IgA nephropathy                                    | 2 (0.9%)                                     |
| Amyloidosis                                        | 3 (1.3%)                                     |
| Systemic lupus erythematosus                       | 6 (2.6%)                                     |
| Diabetic nephropathy (biopsy confirmed)            | 3 (1.3%)                                     |
| Without kidney biopsy (n=199)                      |                                              |
| Diabetic nephropathy                               | 118 (50.6%)                                  |
| Unknown                                            | 81 (34.8%)                                   |

**Supplementary Table 2.** The stages of chronic kidney disease in patients with nephrotic syndrome.

|                                                                              | Nephrotic syndrome<br>N=233 |
|------------------------------------------------------------------------------|-----------------------------|
| Chronic kidney disease stage 1                                               | 29 (12.4%)                  |
| Chronic kidney disease stage 2                                               | 51 (21.9%)                  |
| Chronic kidney disease stage 3                                               | 74 (31.8%)                  |
| Chronic kidney disease stage 4                                               | 36 (15.5%)                  |
| Chronic kidney disease stage 5 (without hemodialysis or peritoneal dialysis) | 29 (12.4%)                  |
| Chronic kidney disease stage 5 (with hemodialysis or peritoneal dialysis)    | 14 (6.0%)                   |

**Supplementary Table 3.** Demographic features of ischemic stroke patients with and without nephrotic syndrome.

|                              | Nephrotic syndrome<br>(n=233) | No nephrotic<br>syndrome<br>(n=1358) | Odds ratio (95% CI) | <i>P</i> value |
|------------------------------|-------------------------------|--------------------------------------|---------------------|----------------|
| Age (year-old)               | 60.58±13.35                   | 69.64±13.28                          |                     | <0.001*        |
| Male                         | 145 (62.2%)                   | 837 (61.6%)                          | 1.03 (0.77-1.37)    | 0.462          |
| Height (cm)                  | 162.58±7.62                   | 160.47±9.61                          |                     | 0.092          |
| Body weight (kg)             | 62.92±10.68                   | 64.35±14.48                          |                     | 0.218          |
| BMI (kg/m <sup>2</sup> )     | 26.06±5.12                    | 25.10±6.11                           |                     | 0.291          |
| SBP at admission (mmHg)      | 169.95±27.15                  | 159.06±29.79                         |                     | 0.032*         |
| DBP at admission (mmHg)      | 90.74±17.76                   | 87.35±18.25                          |                     | 0.302          |
| <b>Risk factors</b>          |                               |                                      |                     |                |
| Hypertension                 | 195 (83.7%)                   | 1014 (74.7%)                         | 1.74 (1.20-2.52)    | 0.001†         |
| Diabetes mellitus            | 152 (65.2%)                   | 574 (42.3%)                          | 2.56 (1.92-3.43)    | <0.001†        |
| Hyperlipidemia               | 149 (63.9%)                   | 759 (55.9%)                          | 1.40 (1.05-1.87)    | 0.013†         |
| Coronary artery disease      | 35 (15.0%)                    | 146 (10.8%)                          | 1.47 (0.99-2.19)    | 0.040†         |
| Congestive heart failure     | 32 (13.7%)                    | 81 (6.0%)                            | 2.51 (1.62-3.88)    | <0.001†        |
| Previous TIA                 | 15 (6.4%)                     | 45 (3.3%)                            | 2.01 (1.10-3.66)    | 0.022†         |
| Atrial fibrillation          | 23 (9.9%)                     | 285 (21.0%)                          | 0.41 (0.26-0.65)    | <0.001†        |
| Hyperuricemia                | 40 (17.2%)                    | 140 (10.3%)                          | 1.80 (1.23-2.64)    | 0.002†         |
| PAOD                         | 9 (3.9%)                      | 17 (1.3%)                            | 3.17 (1.40-7.20)    | 0.009†         |
| Smoking                      | 22 (9.4%)                     | 218 (16.1%)                          | 0.55 (0.34-0.87)    | 0.005†         |
| <b>Other diseases</b>        |                               |                                      |                     |                |
| COPD                         | 12 (5.2%)                     | 71 (5.2%)                            | 0.98 (0.53-1.85)    | 0.557          |
| Systemic lupus erythematosus | 6 (2.6%)                      | 2 (0.1%)                             | 17.92 (3.60-89.34)  | <0.001†        |
| <b>Lab data</b>              |                               |                                      |                     |                |
| WBC (1000/ $\mu$ L)          | 8209.01±3079.67               | 8399.18±3108.89                      |                     | 0.393          |
| Hemoglobin (g/dL)            | 12.02±2.22                    | 13.62±2.09                           |                     | <0.001*        |
| Platelet (1000/ $\mu$ L)     | 220.94K±77.51K                | 229.99K±77.49K                       |                     | 0.104          |
| INR                          | 1.03±0.28                     | 1.02±0.28                            |                     | 0.470          |
| APTT/NC                      | 1.02±0.98                     | 0.98±0.98                            |                     | 0.260          |
| Fibrinogen (mg/dL)           | 441.54±172.69                 | 334.89±123.19                        |                     | <0.001*        |
| Sugar (mg/dL)                | 169.16±95.49                  | 143.81±70.97                         |                     | 0.014*         |
| Glycohemoglobin (%)          | 8.05±2.44                     | 6.77±1.86                            |                     | <0.001*        |
| Hs-CRP (mg/L)                | 13.45±11.96                   | 15.23±10.54                          |                     | 0.588          |
| ESR (mm/hr)                  | 44.84±32.87                   | 16.68±17.12                          |                     | <0.001*        |

|                                    |              |              |         |
|------------------------------------|--------------|--------------|---------|
| BUN (mg/dL)                        | 31.06±11.80  | 16.19±6.08   | <0.001* |
| Creatinine (mg/dL)                 | 2.85±1.24    | 0.92±0.61    | <0.001* |
| eGFR (mL/min/1.73 m <sup>2</sup> ) | 46.57±29.81  | 79.84±14.82  | <0.001* |
| AST (U/L)                          | 26.63±18.33  | 31.45±11.21  | 0.117   |
| ALT (U/L)                          | 23.18±19.44  | 25.92±15.23  | 0.164   |
| Total cholesterol (mg/dL)          | 234.38±88.97 | 183.36±42.86 | <0.001* |
| Triglyceride (mg/dL)               | 208.24±96.21 | 134.78±41.15 | <0.001* |
| LDL (mg/dL)                        | 154.57±45.60 | 117.41±38.65 | <0.001* |
| HDL (mg/dL)                        | 40.79±16.07  | 41.22±13.50  | 0.709   |
| Uric acid (mg/dL)                  | 6.60±1.94    | 5.48±2.22    | <0.001* |
| Sodium (mmol/L)                    | 138.67±4.38  | 138.77±3.78  | 0.734   |
| Potassium (mmol/L)                 | 4.04±0.78    | 4.07±0.91    | 0.900   |
| Calcium (mg/dL)                    | 8.38±1.16    | 8.70±0.98    | 0.007*  |
| Phosphate (mg/dL)                  | 4.03±1.51    | 4.02±2.42    | 0.649   |
| Albumin (g/dL)                     | 2.82±0.77    | 3.58±0.56    | <0.001* |
| Total protein (g/dL)               | 5.69±2.01    | 5.75±1.21    | 0.550   |

CI = confidence interval; BMI= body mass index; SBP = systolic blood pressure; DBP = diastolic blood pressure; TIA = transient ischemic attack; PAOD = peripheral arterial occlusive disease; COPD = chronic obstructive lung disease; WBC = white blood cells; INR = international normalized ratio; APTT/NC = activated partial thromboplastin time/normal control; hs-CRP = high-sensitivity C-reactive protein; ESR = erythrocyte sedimentation rate; BUN = blood urea nitrogen; eGFR = estimated glomerular filtration rate; AST = aspartate transaminase; ALT = alanine aminotransferase; LDL = low-density lipoprotein; HDL= high-density lipoprotein.

Data are presented as mean ± standard deviation or n (%).

\*P < 0.05, Student t test; † P < 0.05, Chi-square test

**Supplementary Table 4.** Logistic regression for predictors of dependent functional status (modified Rankin Scale score  $\geq 3$ ) in patients with ischemic stroke following the 30-day period.

| Variables                               | Univariate Logistic Regression |                | Multivariate Logistic Regression |                |
|-----------------------------------------|--------------------------------|----------------|----------------------------------|----------------|
|                                         | OR (95% CI)                    | <i>P</i> value | OR (95% CI)                      | <i>P</i> value |
| Age                                     | 1.03 (1.02-1.03)               | <0.001*        | 1.02 (1.01-1.03)                 | 0.002†         |
| Male                                    | 0.70 (0.57-0.86)               | 0.001*         | 0.76 (0.60-0.98)                 | 0.035†         |
| Hypertension                            | 1.01 (0.81-1.28)               | 0.914          |                                  |                |
| Diabetes mellitus                       | 1.02 (0.84-1.24)               | 0.836          |                                  |                |
| Hyperlipidemia                          | 0.71 (0.58-0.87)               | 0.001*         |                                  |                |
| CAD                                     | 1.19 (0.87-1.63)               | 0.269          |                                  |                |
| CHF                                     | 2.74 (1.80-4.18)               | <0.001*        |                                  |                |
| Atrial fibrillation                     | 2.95 (2.25-3.85)               | <0.001*        | 1.44 (1.02-2.04)                 | 0.040†         |
| Nephrotic syndrome                      | 2.07 (1.55-2.76)               | <0.001*        | 4.02 (2.39-6.76)                 | <0.001†        |
| Hyperuricemia                           | 0.83 (0.61-1.13)               | 0.236          |                                  |                |
| TACS                                    | 28.55 (15.01-54.34)            | <0.001*        | 13.72 (6.96-27.04)               | <0.001†        |
| Pneumonia                               | 13.50 (9.00-20.55)             | <0.001*        | 5.69 (3.64-8.89)                 | <0.001†        |
| Pulmonary edema                         | 39.21 (5.37-286.48)            | <0.001*        | 9.58 (1.20-76.26)                | 0.033†         |
| WBC count > 10000<br>1000/ $\mu$ L      | 2.07 (1.61-2.67)               | <0.001*        | 1.52 (1.11-2.08)                 | 0.008†         |
| Hemoglobin < 12 g/dL                    | 2.40 (1.87-3.08)               | <0.001*        | 1.52 (1.10-2.08)                 | 0.010†         |
| eGFR < 60 mL/min/1.73<br>m <sup>2</sup> | 1.87 (1.32-2.65)               | <0.001*        | 0.54 (0.29-1.02)                 | 0.056          |
| Sodium < 135 mmol/L                     | 2.12 (1.49-3.02)               | <0.001*        |                                  |                |
| hs-CRP > 3 mg/L                         | 3.85 (3.05-4.85)               | <0.001*        | 2.20 (1.67-2.89)                 | <0.001†        |

OR = odds ratio; CI = confidence interval; CAD = coronary artery disease; CHF = congestive heart failure; TACS = total anterior circulation syndrome; eGFR = estimated glomerular filtration rate; WBC = white blood cell; hs-CRP = high-sensitivity C-reactive protein.

\**P* < 0.1 for the univariate logistic regression, and †*P* < 0.05 for the stepwise multivariate logistic regression.



**Supplementary Table 5.** Clinical courses of ischemic stroke patients with and without nephrotic syndrome.

|                                                       | Nephrotic syndrome<br>(n=233) | No nephrotic syndrome<br>(n=1358) | Odds ratio (95% CI) | <i>P</i> value |
|-------------------------------------------------------|-------------------------------|-----------------------------------|---------------------|----------------|
| <b>Clinical syndromes</b>                             |                               |                                   |                     |                |
| TACS                                                  | 15 (6.4%)                     | 205 (15.1%)                       | 0.39 (0.23-0.67)    | <0.001†        |
| PACS                                                  | 67 (28.8%)                    | 421 (31.0%)                       | 0.90 (0.66-1.22)    | 0.272          |
| LACS                                                  | 90 (38.6%)                    | 517 (38.1%)                       | 1.02 (0.77-1.36)    | 0.463          |
| POCS                                                  | 60 (25.8%)                    | 218 (16.1%)                       | 1.82 (1.31-2.52)    | <0.001†        |
| <b>TOAST classification</b>                           |                               |                                   |                     |                |
| Large-artery atherosclerosis                          | 43 (18.45%)                   | 216 (15.91%)                      | 1.20 (0.84-1.73)    | 0.316          |
| Cardioembolism                                        | 23 (9.87%)                    | 259 (19.07%)                      | 0.47 (0.30-0.73)    | <0.001†        |
| Small-artery occlusion                                | 118 (50.64%)                  | 419 (30.85%)                      | 2.32 (1.75-3.08)    | <0.001†        |
| Stroke of other determined etiology                   | 11 (4.72%)                    | 27 (1.99%)                        | 2.44 (1.20-5.00)    | 0.012†         |
| Stroke of undetermined etiology                       | 38 (16.31%)                   | 437 (32.18%)                      | 0.43 (0.30-0.61)    | <0.001†        |
| Intra-arterial thrombectomy                           | 0 (0%)                        | 2 (0.1%)                          |                     | 0.728          |
| Intra-venous thrombolysis                             | 4 (1.7%)                      | 74 (5.4%)                         | 0.30 (0.11-0.84)    | 0.006†         |
| Mean length of stay in the acute medicine ward (days) | 14.73±12.35                   | 13.42±10.19                       |                     | 0.086          |
| Stroke in evolution                                   | 29 (12.4%)                    | 181 (13.3%)                       | 0.92 (0.61-1.41)    | 0.403          |
| <b>Complication at admission</b>                      |                               |                                   |                     |                |
| Pneumonia                                             | 40 (17.2%)                    | 248 (18.3%)                       | 0.93 (0.64-1.34)    | 0.384          |
| GI bleeding                                           | 21 (9.0%)                     | 134 (9.9%)                        | 0.91 (0.56-1.47)    | 0.395          |
| Urinary tract infection                               | 29 (12.4%)                    | 184 (13.5%)                       | 0.91 (0.60-1.38)    | 0.368          |
| Other infection                                       | 17 (7.3%)                     | 67 (4.9%)                         | 1.52 (0.87-1.63)    | 0.095          |
| Acute coronary syndrome                               | 3 (1.3%)                      | 19 (1.4%)                         | 0.92 (0.27-3.13)    | 0.594          |
| Venous thromboembolism                                | 2 (0.9%)                      | 5 (0.4%)                          | 2.34 (0.45-12.15)   | 0.273          |
| Pulmonary edema                                       | 13 (5.6%)                     | 25 (1.8%)                         | 3.15 (1.59-6.25)    | 0.002†         |
| <b>Medication during admission</b>                    |                               |                                   |                     |                |
| Warfarin                                              | 13 (5.6%)                     | 47 (3.5%)                         | 1.65 (0.88-3.10)    | 0.088          |
| Aspirin                                               | 143 (61.4%)                   | 853 (62.8%)                       | 0.96 (0.72-1.27)    | 0.402          |
| P2Y12 inhibitors                                      | 57 (24.5%)                    | 264 (19.4%)                       | 1.34 (0.97-1.86)    | 0.049†         |
| Heparin in acute stage                                | 10 (4.3%)                     | 25 (1.8%)                         | 2.39 (1.13-5.05)    | 0.024†         |
| NOACs                                                 | 1 (0.4%)                      | 146 (10.8%)                       | 0.04 (0.01-0.26)    | <0.001†        |
| Statins                                               | 82 (35.2%)                    | 596 (43.9%)                       | 0.69 (0.52-0.93)    | 0.008†         |
| <b>Glasgow coma scale score</b>                       |                               |                                   |                     |                |
| Upon admission                                        | 15 (15-15)                    | 15 (15-15)                        |                     | 0.001*         |

|                                      |             |             |                  |         |
|--------------------------------------|-------------|-------------|------------------|---------|
| Upon discharge                       | 15 (15-15)  | 15 (15-15)  |                  | <0.001* |
| NIHSS score                          |             |             |                  |         |
| Upon admission                       | 6 (4-14)    | 4 (3-9)     |                  | 0.087   |
| Upon discharge                       | 6 (3-18)    | 4 (3-10)    |                  | 0.241   |
| modified Rankin scale score          |             |             |                  |         |
| Upon admission                       | 3 (2-4)     | 2 (1-4)     |                  | <0.001* |
| Upon admission                       | 3 (2-4)     | 2 (1-4)     |                  | <0.001* |
| Death within 30 days                 | 8 (3.4%)    | 64 (4.7%)   | 0.72 (0.34-1.52) | 0.249   |
| Recurrent stroke within 30 days      | 0 (0%)      | 7 (0.5%)    |                  | 0.331   |
| modified Rankin scale score $\geq 3$ | 151 (64.8%) | 640 (47.1%) | 2.07 (1.55-2.76) | <0.001† |

CI = confidence interval; TACS = total anterior circulation syndrome; PACS = partial anterior circulation syndrome; LACS = lacunar syndrome; POCS = posterior circulation syndrome; TOAST = Trial of ORG 10172 in Acute Stroke Treatment; GI = gastrointestinal; NOACs = non-vitamin K antagonist oral anticoagulants; NIHSS = national institute of health stroke scale.

Data are presented as mean  $\pm$  standard deviation, median (interquartile range) or n (%).

\*P < 0.05, Student t test or Mann-Whitney U test; † P < 0.05, Chi-square test

**Supplementary Table 6.** Primary and secondary endpoints of ischemic stroke

patients with and without nephrotic syndrome, specified in Keelung branch of Chang

Gung Memorial Hospital, from 2016 to 2017.

|                                      | Nephrotic syndrome<br>(n=17) | No nephrotic syndrome<br>(n=769) | <i>P</i> value |
|--------------------------------------|------------------------------|----------------------------------|----------------|
| Death within 30 days                 | 1 (5.9%)                     | 38 (4.9%)                        | 0.217          |
| Recurrent stroke within 30 days      | 0 (0%)                       | 4 (0.5%)                         | 0.911          |
| modified Rankin scale score $\geq 3$ | 13 (76.5%)                   | 320 (41.6%)                      |                |
| Odds ratio (95% CI)                  | 4.56 (1.47-14.11)            | 1                                | 0.004†         |
| Adjusted odds ratio (95% CI)         | 3.95 (1.10-14.11)            | 1                                | 0.035‡         |

CI = confidence interval.

Data are presented as n (%).

† $P < 0.05$ , Chi-square test; ‡  $P < 0.05$ , adjusted odds ratio and *P* value using

multivariate logistic regression analysis, variates include age, male gender,

hyperlipidemia, congestive heart failure, atrial fibrillation, nephrotic syndrome, total

anterior circulation syndrome, pneumonia, pulmonary edema, white blood cell count

$> 10000$   $1000/\mu\text{L}$ , Hemoglobin  $< 12$  g/dL, estimated glomerular filtration rate  $< 60$

mL/min/1.73 m<sup>2</sup>, Sodium  $< 135$  mmol/L, and high-sensitivity C-reactive protein  $> 3$

mg/L.

**Supplementary Table 7.** Primary and secondary endpoints of ischemic stroke

patients with and without nephrotic syndrome, specified in the group with estimated glomerular filtration rate  $\geq 60$  mL/min/1.73 m<sup>2</sup>.

|                                      | Nephrotic syndrome<br>(n=80) | No nephrotic syndrome<br>(n=1358) | <i>P</i> value |
|--------------------------------------|------------------------------|-----------------------------------|----------------|
| Death within 30 days                 | 1 (1.2%)                     | 64 (4.7%)                         | 0.111          |
| Recurrent stroke within 30 days      | 0 (0%)                       | 7 (0.5%)                          | 0.669          |
| modified Rankin scale score $\geq 3$ | 53 (66.2%)                   | 640 (47.1%)                       |                |
| Odds ratio (95% CI)                  | 2.20 (1.37-3.54)             | 1                                 | 0.001†         |
| Adjusted odds ratio (95% CI)         | 4.24 (2.51-7.14)             | 1                                 | <0.001‡        |

CI = confidence interval.

Data are presented as n (%).

† $P < 0.05$ , Chi-square test; ‡  $P < 0.05$ , adjusted odds ratio and *P* value using

multivariate logistic regression analysis, variates include age, male gender,

hyperlipidemia, congestive heart failure, atrial fibrillation, nephrotic syndrome, total

anterior circulation syndrome, pneumonia, pulmonary edema, white blood cell count

> 10000 1000/ $\mu$ L, Hemoglobin < 12 g/dL, Sodium < 135 mmol/L, and high-

sensitivity C-reactive protein > 3 mg/L.

**Supplementary Table 8.** Demographic features and clinical courses of ischemic stroke patients, with and without nephrotic syndrome.

|                          | Large-artery atherosclerosis |               | Cardioembolism    |               | Small-artery occlusion |               | Stroke of other determined etiology |              | Stroke of undetermined etiology |               |
|--------------------------|------------------------------|---------------|-------------------|---------------|------------------------|---------------|-------------------------------------|--------------|---------------------------------|---------------|
|                          | NS (n=43)                    | No NS (n=216) | NS (n=23)         | No NS (n=259) | NS (n=118)             | No NS (n=419) | NS (n=11)                           | No NS (n=27) | NS (n=38)                       | No NS (n=437) |
| Age (years)              | 60.16±15.39                  | 68.59±12.53   | 68.35±10.42       | 76.47±11.49   | 61.03±10.20            | 67.08±12.47   | 36.91±14.69                         | 53.93±14.86  | 61.77±13.71                     | 69.48±13.50   |
| <i>P</i> value           | <0.001*                      |               | 0.001*            |               | <0.001*                |               | 0.003*                              |              | 0.001*                          |               |
| Male (%)                 | 25 (58.1%)                   | 142 (65.7%)   | 16 (69.6%)        | 135 (52.1%)   | 75 (63.6%)             | 266 (63.5%)   | 6 (54.5%)                           | 13 (48.1%)   | 24 (63.2%)                      | 277 (63.4%)   |
| OR (95% CI)              | 0.71 (0.37-1.39)             |               | 2.08 (0.83-5.23)  |               | 0.98 (0.64-1.50)       |               | 1.29 (0.32-5.28)                    |              | 0.91 (0.47-1.79)                |               |
| <i>P</i> value           | 0.206                        |               | 0.084             |               | 0.511                  |               | 0.500                               |              | 0.458                           |               |
| Height (cm)              | 161.67±8.13                  | 161.24±9.05   | 164.55±3.02       | 158.19±5.78   | 162.02±7.97            | 160.51±9.56   | 165.83±10.01                        | 160.61±8.99  | 163.50±6.59                     | 161.41±7.51   |
| <i>P</i> value           | 0.875                        |               | 0.206             |               | 0.498                  |               | 0.236                               |              | 0.538                           |               |
| Weight (kg)              | 61.40±15.41                  | 65.32±14.54   | 67.26±4.16        | 60.26±13.21   | 64.36±9.35             | 67.46±10.20   | 57.33±4.23                          | 58.28±10.18  | 58.36±10.80                     | 63.30±13.95   |
| <i>P</i> value           | 0.256                        |               | <0.001*           |               | 0.049*                 |               | 0.759                               |              | 0.209                           |               |
| BMI (kg/m <sup>2</sup> ) | 25.64±4.70                   | 25.28±5.32    | 24.67±1.58        | 24.99±3.44    | 27.34±9.48             | 25.86±4.55    | 19.54±1.18                          | 22.52±3.94   | 23.76±2.31                      | 24.48±3.38    |
| <i>P</i> value           | 0.836                        |               | 0.940             |               | 0.222                  |               | 0.218                               |              | 0.435                           |               |
| SBP at admission (mmHg)  | 175.17±29.47                 | 162.69±31.21  | 160.33±37.29      | 153.40±31.14  | 176.20±27.64           | 164.68±26.38  | 160±28.10                           | 152.83±30.76 | 156.89±20.94                    | 155.57±30.29  |
| <i>P</i> value           | 0.373                        |               | 0.712             |               | 0.089                  |               | 0.838                               |              | 0.899                           |               |
| DBP at admission (mmHg)  | 95.80±29.04                  | 87.08±18.22   | 88.50±23.53       | 88.60±22.43   | 91.72±18.68            | 88.04±15.94   | 90.01±22.88                         | 95.67±17.11  | 86.56±10.62                     | 85.37±17.85   |
| <i>P</i> value           | 0.352                        |               | 0.995             |               | 0.400                  |               | 0.771                               |              | 0.846                           |               |
| Risk factors (%)         |                              |               |                   |               |                        |               |                                     |              |                                 |               |
| Hypertension             | 38 (88.4%)                   | 171 (79.2%)   | 21 (91.3%)        | 185 (71.4%)   | 101 (85.6%)            | 341 (81.4%)   | 7 (63.6%)                           | 9 (33.3%)    | 29 (76.3%)                      | 302 (69.1%)   |
| OR (95% CI)              | 1.96 (0.73-5.26)             |               | 4.14 (0.95-18.12) |               | 1.31 (0.74-2.31)       |               | 3.50 (0.81-15.16)                   |              | 1.28 (0.61-2.70)                |               |

|                |                   |             |                   |             |                     |             |                   |           |                   |             |
|----------------|-------------------|-------------|-------------------|-------------|---------------------|-------------|-------------------|-----------|-------------------|-------------|
| <i>P</i> value | 0.126             |             | 0.029†            |             | 0.219               |             | 0.088             |           | 0.329             |             |
| DM             | 30 (69.8%)        | 124 (57.4%) | 7 (30.4%)         | 81 (31.3%)  | 95 (80.5%)          | 192 (45.8%) | 1 (9.1%)          | 8 (29.6%) | 20 (52.6%)        | 167 (38.2%) |
| OR (95% CI)    | 1.69 (0.84-3.43)  |             | 0.96 (0.38-2.41)  |             | 4.82 (2.94-7.90)    |             | 0.24 (0.03-2.18)  |           | 1.69 (0.88-3.26)  |             |
| <i>P</i> value | 0.095             |             | 0.565             |             | <0.001†             |             | 0.179             |           | 0.081             |             |
| Hyperlipidemia | 30 (69.8%)        | 143 (66.2%) | 7 (30.4%)         | 93 (35.9%)  | 82 (69.5%)          | 265 (63.2%) | 6 (54.5%)         | 9 (33.3%) | 25 (65.8%)        | 244 (55.8%) |
| OR (95% CI)    | 1.16 (0.57-2.36)  |             | 0.78 (0.31-1.96)  |             | 1.30 (0.84-2.01)    |             | 2.40 (0.57-10.04) |           | 1.40 (0.71-2.76)  |             |
| <i>P</i> value | 0.412             |             | 0.385             |             | 0.146               |             | 0.198             |           | 0.213             |             |
| CAD            | 3 (7.0%)          | 23 (10.6%)  | 6 (26.1%)         | 41 (15.8%)  | 19 (16.1%)          | 36 (8.6%)   | 0 (0%)            | 1 (3.7%)  | 7 (18.4%)         | 36 (8.9%)   |
| OR (95% CI)    | 0.43 (0.13-1.47)  |             | 1.87 (0.70-5.02)  |             | 2.03 (1.11-3.69)    |             |                   |           | 2.42 (1.00-5.88)  |             |
| <i>P</i> value | 0.124             |             | 0.166             |             | 0.018†              |             | 0.711             |           | 0.051             |             |
| CHF            | 8 (18.6%)         | 5 (2.3%)    | 6 (26.1%)         | 47 (18.1%)  | 12 (10.2%)          | 9 (2.1%)    | 1 (9.1%)          | 1 (3.7%)  | 5 (13.2%)         | 19 (4.3%)   |
| OR (95% CI)    | 9.60 (2.97-31.03) |             | 1.58 (0.59-4.23)  |             | 5.12 (2.10-12.47)   |             | 2.60 (0.15-45.68) |           | 3.22 (1.13-9.16)  |             |
| <i>P</i> value | <0.001†           |             | 0.250             |             | <0.001†             |             | 0.501             |           | 0.038†            |             |
| AF             | 0 (0%)            | 4 (1.9%)    | 20 (87.0%)        | 245 (94.6%) | 2 (1.7%)            | 10 (2.4%)   | 0 (0%)            | 0 (0%)    | 1 (2.6%)          | 26 (5.9%)   |
| OR (95% CI)    |                   |             | 0.35 (0.09-1.35)  |             | 0.70 (0.15-3.24)    |             |                   |           | 0.41 (0.56-3.14)  |             |
| <i>P</i> value | 0.480             |             | 0.133             |             | 0.484               |             |                   |           | 0.328             |             |
| Hyperuricemia  | 10 (23.3%)        | 18 (8.3%)   | 8 (34.8%)         | 29 (11.2%)  | 14 (11.9%)          | 46 (11.0%)  | 3 (27.3%)         | 2 (7.4%)  | 6 (15.8%)         | 45 (10.3%)  |
| OR (95% CI)    | 3.31 (1.41-7.81)  |             | 4.21 (1.64-10.79) |             | 1.09 (0.57-2.05)    |             | 4.69 (0.66-33.22) |           | 1.58 (0.63-3.97)  |             |
| <i>P</i> value | 0.008†            |             | 0.005†            |             | 0.459               |             | 0.134             |           | 0.232             |             |
| PAOD           | 3 (7.0%)          | 4 (1.9%)    | 1 (4.3%)          | 7 (2.7%)    | 4 (3.4%)            | 1 (0.2%)    | 0 (0%)            | 1 (3.7%)  | 1 (2.6%)          | 4 (0.9%)    |
| OR (95% CI)    | 3.96 (0.85-18.36) |             | 1.63 (0.19-13.86) |             | 14.56 (1.61-131.56) |             |                   |           | 2.84 (0.31-26.01) |             |
| <i>P</i> value | 0.093             |             | 0.500             |             | 0.009†              |             | 0.711             |           | 0.350             |             |
| Smoking        | 4 (9.3%)          | 34 (15.7%)  | 0 (0%)            | 28 (10.8%)  | 15 (12.7%)          | 67 (16.0%)  | 0 (0%)            | 3 (11.1%) | 3 (7.9%)          | 86 (19.7%)  |
| OR (95% CI)    | 0.55 (0.18-1.63)  |             |                   |             | 0.76 (0.42-1.38)    |             |                   |           | 0.34 (0.10-1.12)  |             |
| <i>P</i> value | 0.197             |             | 0.080             |             | 0.227               |             | 0.347             |           | 0.042†            |             |
| Previous TIA   | 2 (4.7%)          | 8 (3.7%)    | 2 (8.7%)          | 9 (3.5%)    | 9 (7.6%)            | 10 (2.4%)   | 1 (9.1%)          | 1 (3.7%)  | 1 (2.6%)          | 17 (3.9%)   |
| OR (95% CI)    | 1.26 (0.26-6.16)  |             | 2.64 (0.53-12.99) |             | 3.35 (1.33-8.45)    |             | 2.60 (0.15-45.68) |           | 0.65 (0.08-5.00)  |             |

| <i>P</i> value     | 0.519            |            | 0.224             |             | 0.012†             |             | 0.501              |            | 0.555            |             |
|--------------------|------------------|------------|-------------------|-------------|--------------------|-------------|--------------------|------------|------------------|-------------|
| Other diseases     |                  |            |                   |             |                    |             |                    |            |                  |             |
| COPD               | 5 (11.6%)        | 11 (5.1%)  | 4 (17.4%)         | 15 (5.8%)   | 2 (1.7%)           | 20 (4.8%)   | 0 (0%)             | 0 (0%)     | 1 (2.6%)         | 25 (5.7%)   |
| OR (95% CI)        | 2.44 (0.80-7.42) |            | 3.41 (1.03-11.30) |             | 0.34 (0.08-1.48)   |             |                    |            | 0.43 (0.06-3.27) |             |
| <i>P</i> value     | 0.107            |            | 0.058             |             | 0.101              |             |                    |            | 0.350            |             |
| SLE                | 0 (0%)           | 0 (0%)     | 0 (0%)            | 0 (0%)      | 0 (0%)             | 0 (0%)      | 6 (54.5%)          | 2 (7.4%)   | 0 (0%)           | 0 (0%)      |
| OR (95% CI)        |                  |            |                   |             |                    |             | 15.00 (2.32-96.96) |            |                  |             |
| <i>P</i> value     |                  |            |                   |             |                    |             | 0.004†             |            |                  |             |
| Clinical syndromes |                  |            |                   |             |                    |             |                    |            |                  |             |
| TACS               | 8 (18.6%)        | 50 (23.1%) | 6 (26.1%)         | 111 (42.9%) | 0 (0%)             | 0 (0%)      | 0 (0%)             | 4 (14.8%)  | 1 (2.6%)         | 37 (8.5%)   |
| OR (95% CI)        | 0.75 (0.33-1.73) |            | 0.47 (0.18-1.22)  |             |                    |             |                    |            | 0.28 (0.04-2.12) |             |
| <i>P</i> value     | 0.328            |            | 0.085             |             |                    |             | 0.238              |            | 0.157            |             |
| PACS               | 13 (30.2%)       | 78 (36.1%) | 7 (30.4%)         | 96 (37.1%)  | 19 (16.1%)         | 5 (1.2%)    | 8 (72.7%)          | 14 (51.9%) | 20 (52.6%)       | 224 (51.3%) |
| OR (95% CI)        | 0.76 (0.38-1.55) |            | 0.74 (0.29-1.86)  |             | 15.78 (5.75-43.28) |             | 2.48(0.54-11.40)   |            | 0.99 (0.52-1.91) |             |
| <i>P</i> value     | 0.283            |            | 0.343             |             | <0.001†            |             | 0.208              |            | 0.556            |             |
| LACS               | 8 (18.6%)        | 24 (11.1%) | 4 (17.4%)         | 21 (8.1%)   | 72 (61.0%)         | 372 (88.8%) | 0 (0%)             | 3 (11.1%)  | 7 (18.4%)        | 95 (21.7%)  |
| OR (95% CI)        | 1.82 (0.76-4.38) |            | 2.38 (0.74-7.63)  |             | 0.19 (0.11-0.30)   |             |                    |            | 0.78 (0.34-1.83) |             |
| <i>P</i> value     | 0.137            |            | 0.134             |             | <0.001†            |             | 0.347              |            | 0.369            |             |
| POCS               | 14 (32.6%)       | 63 (29.2%) | 6 (26.1%)         | 30 (11.6%)  | 27 (22.9%)         | 39 (9.3%)   | 3 (27.3%)          | 6 (22.2%)  | 10 (26.3%)       | 79 (18.1%)  |
| OR (95% CI)        | 1.17 (0.58-2.35) |            | 2.68 (0.98-7.33)  |             | 2.87 (1.67-4.93)   |             | 1.31 (0.26-6.55)   |            | 1.55 (0.73-3.32) |             |
| <i>P</i> value     | 0.398            |            | 0.057             |             | <0.001†            |             | 0.522              |            | 0.174            |             |

NS = nephrotic syndrome; OR = odds ratio; CI = confidence interval; BMI = body mass index; SBP = systolic blood pressure; DBP = diastolic blood pressure;

DM = diabetes mellitus; CAD = coronary artery disease; CHF = congestive heart failure; AF = atrial fibrillation; PAOD = peripheral arterial occlusive disease;

TIA = transient ischemic attack; COPD = chronic obstructive pulmonary disease; SLE = Systemic lupus erythematosus; TACS = total anterior circulation syndrome; PACS = partial anterior circulation syndrome; LACS = lacunar syndrome; POCS = posterior circulation syndrome;.

Data are presented as mean  $\pm$  standard deviation or n (%).

\* $P < 0.05$ , Student t test; † $P < 0.05$ , Chi-square test



**Supplementary Table 9.** Laboratory findings of ischemic stroke patients, with and without nephrotic syndrome.

|                          | Large-artery atherosclerosis |                    | Cardioembolism     |                    | Small-artery occlusion |                    | Stroke of other determined etiology |                    | Stroke of undetermined etiology |                    |
|--------------------------|------------------------------|--------------------|--------------------|--------------------|------------------------|--------------------|-------------------------------------|--------------------|---------------------------------|--------------------|
|                          | NS (n=43)                    | No NS (n=216)      | NS (n=23)          | No NS (n=259)      | NS (n=118)             | No NS (n=419)      | NS (n=11)                           | No NS (n=27)       | NS (n=38)                       | No NS (n=437)      |
| WBC (1000/ $\mu$ L)      | 8316.28 $\pm$ 2729           | 9250.79 $\pm$ 3816 | 7952.17 $\pm$ 2169 | 8326.72 $\pm$ 3133 | 7855.56 $\pm$ 3176     | 7766.81 $\pm$ 2277 | 8845.45 $\pm$ 4488                  | 10561.90 $\pm$ 617 | 9123.08 $\pm$ 3070              | 8498.76 $\pm$ 2989 |
| <i>P</i> value           | .11                          | .00                | .39                | .81                | .65                    | .36                | .29                                 | 4.50               | .78                             | .05                |
|                          | 0.130                        |                    | 0.576              |                    | 0.783                  |                    | 0.422                               |                    | 0.217                           |                    |
| Hemoglobin (g/dL)        | 11.89 $\pm$ 2.41             | 13.85 $\pm$ 2.23   | 12.64 $\pm$ 2.31   | 13.29 $\pm$ 2.04   | 11.99 $\pm$ 2.06       | 13.94 $\pm$ 1.81   | 12.33 $\pm$ 3.92                    | 12.04 $\pm$ 3.16   | 11.77 $\pm$ 1.84                | 13.49 $\pm$ 2.15   |
| <i>P</i> value           | <0.001*                      |                    | 0.148              |                    | <0.001*                |                    | 0.820                               |                    | <0.001*                         |                    |
| Platelet (1000/ $\mu$ L) | 205.63K $\pm$ 76.2           | 232.59 $\pm$ 67.87 | 231.35K $\pm$ 72.6 | 214.27K $\pm$ 78.6 | 217.36K $\pm$ 72.8     | 228.39K $\pm$ 67.9 | 212.55K $\pm$ 112.                  | 244.36K $\pm$ 103. | 244.77K $\pm$ 80.0              | 239.41K $\pm$ 86.4 |
|                          | 4K                           | K                  | 3K                 | 2K                 | 1K                     | 1K                 | 42K                                 | 58K                | 7K                              | 8K                 |
| <i>P</i> value           | 0.023*                       |                    | 0.319              |                    | 0.136                  |                    | 0.432                               |                    | 0.711                           |                    |
| INR                      | 0.95 $\pm$ 0.12              | 0.99 $\pm$ 0.11    | 1.24 $\pm$ 0.36    | 1.05 $\pm$ 0.10    | 1.05 $\pm$ 0.32        | 0.99 $\pm$ 0.08    | 1.01 $\pm$ 0.14                     | 1.22 $\pm$ 0.29    | 0.95 $\pm$ 0.06                 | 1.02 $\pm$ 0.23    |
| <i>P</i> value           | 0.058                        |                    | 0.068              |                    | 0.138                  |                    | 0.331                               |                    | 0.486                           |                    |
| APTT/NC                  | 1.00 $\pm$ 0.13              | 0.90 $\pm$ 0.12    | 1.01 $\pm$ 0.13    | 0.99 $\pm$ 0.12    | 1.10 $\pm$ 0.29        | 0.99 $\pm$ 0.11    | 1.12 $\pm$ 0.19                     | 1.02 $\pm$ 0.10    | 0.99 $\pm$ 0.16                 | 0.98 $\pm$ 0.15    |
| <i>P</i> value           | 0.518                        |                    | 0.331              |                    | 0.334                  |                    | 0.069                               |                    | 0.737                           |                    |
| Glycohemoglobin (%)      | 8.56 $\pm$ 2.79              | 7.23 $\pm$ 2.10    | 6.79 $\pm$ 1.52    | 6.22 $\pm$ 0.98    | 8.31 $\pm$ 2.43        | 6.97 $\pm$ 2.09    | 6.26 $\pm$ 1.59                     | 6.74 $\pm$ 2.08    | 7.60 $\pm$ 2.27                 | 6.64 $\pm$ 1.76    |
| <i>P</i> value           | 0.021*                       |                    | 0.185              |                    | <0.001*                |                    | 0.645                               |                    | 0.063                           |                    |
| ESR (mm/hr)              | 57.44 $\pm$ 42.59            | 17.51 $\pm$ 6.54   | 29.20 $\pm$ 15.07  | 16.53 $\pm$ 10.68  | 43.80 $\pm$ 21.32      | 12.90 $\pm$ 6.13   | 32.75 $\pm$ 24.72                   | 33.45 $\pm$ 27.08  | 47.67 $\pm$ 24.16               | 18.99 $\pm$ 15.3   |
| <i>P</i> value           | 0.023*                       |                    | 0.152              |                    | <0.001*                |                    | 0.970                               |                    | 0.015*                          | 3                  |
| BUN (mg/dL)              | 31.79 $\pm$ 20.21            | 15.71 $\pm$ 5.76   | 26.20 $\pm$ 10.42  | 17.91 $\pm$ 6.28   | 32.32 $\pm$ 15.76      | 15.52 $\pm$ 3.05   | 27.68 $\pm$ 12.74                   | 15.32 $\pm$ 4.81   | 30.78 $\pm$ 19.76               | 16.11 $\pm$ 6.91   |
| <i>P</i> value           | <0.001*                      |                    | 0.001*             |                    | <0.001*                |                    | 0.020*                              |                    | <0.001*                         |                    |

|                                       |              |              |              |              |               |              |               |               |              |              |
|---------------------------------------|--------------|--------------|--------------|--------------|---------------|--------------|---------------|---------------|--------------|--------------|
| Creatinine (mg/dL)                    | 2.79±1.82    | 0.93±0.28    | 1.82±1.01    | 1.13±0.99    | 3.07±2.02     | 0.94±0.23    | 1.92±0.85     | 0.87±0.25     | 3.17±2.11    | 0.97±0.31    |
| <i>P</i> value                        | <0.001*      |              | 0.061        |              | <0.001*       |              | 0.007*        |               | <0.001*      |              |
| eGFR<br>(mL/min/1.73 m <sup>2</sup> ) | 46.23±30.92  | 81.41±14.13  | 53.96±25.02  | 76.72±14.44  | 45.04±30.02*  | 80.95±14.67  | 51.69±29.78   | 83.82±16.04   | 45.70±31.21  | 75.79±15.19  |
| <i>P</i> value                        | <0.001*      |              | <0.001*      |              | <0.001*       |              | 0.005*        |               | <0.001*      |              |
| Total cholesterol<br>(mg/dL)          | 244.76±93.77 | 187.46±41.82 | 202.10±65.64 | 173.12±44.23 | 240.50±90.30  | 184.10±40.50 | 226.4±72.51   | 208.24±69.12  | 224.09±54.44 | 185.22±41.45 |
| <i>P</i> value                        | 0.001*       |              | 0.151        |              | <0.001*       |              | 0.531         |               | 0.012*       |              |
| Triglyceride<br>(mg/dL)               | 271.62±79.43 | 139.70±52.61 | 122.70±52.76 | 102.86±34.92 | 213.41±104.54 | 152.12±89.28 | 224.40±117.19 | 211.67±123.58 | 169.84±71.17 | 129.77±45.12 |
| <i>P</i> value                        | 0.002*       |              | 0.149        |              | <0.001*       |              | 0.865         |               | 0.060        |              |
| LDL (mg/dL)                           | 150.10±53.24 | 121.59±36.23 | 123.13±38.71 | 107.74±34.67 | 163.64±44.97  | 116.29±35.81 | 130.29±31.12  | 134.48±46.64  | 154.40±46.23 | 121.11±39.81 |
| <i>P</i> value                        | 0.054        |              | 0.111        |              | 0.001*        |              | 0.865         |               | 0.018*       |              |
| HDL (mg/dL)                           | 41.18±15.53  | 39.14±10.29  | 34.69±7.65   | 46.03±10.46  | 38.95±11.23   | 41.11±14.12  | 46.71±10.12   | 34.77±8.65    | 48.43±19.43  | 40.20±13.04  |
| <i>P</i> value                        | 0.597        |              | <0.001*      |              | 0.158         |              | 0.122         |               | 0.070        |              |
| Uric acid (mg/dL)                     | 6.66±1.85    | 5.58±1.72    | 6.93±2.08    | 5.51±1.53    | 6.46±1.85     | 5.51±1.14    | 7.98±2.37     | 5.82±1.87     | 6.56±2.13    | 5.36±1.51    |
| <i>P</i> value                        | 0.132        |              | 0.003*       |              | <0.001*       |              | 0.047*        |               | <0.001*      |              |
| Potassium<br>(mmol/L)                 | 4.06±0.78    | 3.91±1.13    | 3.71±0.90    | 4.05±1.10    | 4.01±0.61     | 4.43±0.78    | 4.60±0.70     | 3.87±0.47     | 4.17±0.75    | 3.82±0.45    |
| <i>P</i> value                        | 0.439        |              | 0.464        |              | 0.547         |              | 0.002*        |               | 0.011*       |              |
| Calcium (mg/dL)                       | 8.24±0.90    | 8.85±0.71    | 8.59±1.10    | 8.34±1.23    | 8.38±0.95     | 8.65±1.01    | 8.16±0.67     | 8.33±0.47     | 8.44±0.73    | 8.87±0.58    |
| <i>P</i> value                        | 0.116        |              | 0.511        |              | 0.320         |              | 0.779         |               | 0.004*       |              |
| Albumin (g/dL)                        | 2.76±0.49    | 3.61±0.55    | 2.69±0.56    | 3.39±0.61    | 2.85±0.78     | 3.81±0.43    | 2.86±1.02     | 2.18±0.38     | 2.88±0.72    | 3.60±0.62    |
| <i>P</i> value                        | <0.001*      |              | <0.001*      |              | <0.001*       |              | 0.107         |               | <0.001*      |              |
| Fibrinogen (mg/dL)                    | 473.00±197.4 | 320.27±151.7 | 731.50±395.2 | 428.86±182.1 | 396.79±117.0  | 298.70±43.56 | 341.67±112.4  | 320.10±116.1  | 465.15±157.4 | 336.06±110.2 |

|                      |              |              |              |              |              |              |             |              |              |              |
|----------------------|--------------|--------------|--------------|--------------|--------------|--------------|-------------|--------------|--------------|--------------|
|                      | 0            | 6            | 7            | 5            | 9            | 8            | 7           | 8            | 3            |              |
| <i>P</i> value       | 0.086        |              | 0.138        |              | 0.010*       | 0.789        |             | 0.008*       |              |              |
| Sugar (mg/dL)        | 178.11±98.66 | 162.95±74.95 | 126.63±36.54 | 155.55±94.61 | 180.93±97.52 | 143.59±46.82 | 95.40±7.80  | 251.50±117.4 | 169.82±88.45 | 123.03±49.19 |
| <i>P</i> value       | 0.593        |              | 0.132        |              | 0.014*       | 0.431        |             | 0.050        |              |              |
| Hs-CRP (mg/L)        | 21.91±19.68  | 18.29±13.52  | 14.41±13.32  | 24.06±22.12  | 10.18±9.23   | 7.04±6.53    | 5.61±8.96   | 42.15±33.79  | 14.94±13.68  | 12.69±10.77  |
| <i>P</i> value       | 0.654        |              | 0.473        |              | 0.321        | 0.225        |             | 0.675        |              |              |
| AST (U/L)            | 26.39±14.42  | 32.71±23.17  | 35.68±22.24  | 30.84±15.41  | 26.31±19.48  | 29.95±24.65  | 23.29±13.95 | 34.50±25.03  | 22.68±11.80  | 32.26±17.33  |
| <i>P</i> value       | 0.152        |              | 0.405        |              | 0.505        | 0.313        |             | 0.302        |              |              |
| ALT (U/L)            | 27.03±12.38  | 26.82±17.52  | 21.74±19.97  | 25.35±10.87  | 23.10±15.81  | 24.97±17.22  | 18.00±7.11  | 32.79±20.27  | 21.00±10.24  | 26.40±12.72  |
| <i>P</i> value       | 0.966        |              | 0.405        |              | 0.384        | 0.010*       |             | 0.404        |              |              |
| Sodium (mmol/L)      | 138.26±5.74  | 138.61±3.82  | 139.54±3.79  | 138.91±4.28  | 139.06±4.20  | 138.92±3.61  | 137.91±3.53 | 138.47±7.00  | 137.61±3.67  | 138.61±3.36  |
| <i>P</i> value       | 0.633        |              | 0.510        |              | 0.764        | 0.808        |             | 0.093        |              |              |
| Phosphate (mg/dL)    | 3.78±1.57    | 3.28±0.69    | 3.35±1.39    | 3.70±0.97    | 3.15±1.59    | 5.67±2.05    | 4.13±1.02   | 4.85±1.91    | 4.36±1.29    | 3.98±1.94    |
| <i>P</i> value       | 0.496        |              | 0.567        |              | 0.600        | 0.497        |             | 0.496        |              |              |
| Total protein (g/dL) | 5.32±0.91    | 6.48±0.64    | 5.48±1.15    | 5.62±1.26    | 5.40±1.01    | 5.16±1.80    | 5.60±1.10   | 4.90±0.28    | 5.68±0.93    | 5.47±1.15    |
| <i>P</i> value       | 0.003*       |              | 0.775        |              | 0.546        | 0.463        |             | 0.346        |              |              |

NS = nephrotic syndrome; WBC = white blood cells; INR = international normalized ratio; APTT/NC = activated partial thromboplastin time/normal control;

ESR = erythrocyte sedimentation rate; BUN = blood urea nitrogen; eGFR = estimated glomerular filtration rate; LDL = low-density lipoprotein; HDL= high-

density lipoprotein; hs-CRP = high-sensitivity C-reactive protein; AST = aspartate transaminase; ALT = alanine aminotransferase.

Data are presented as mean ± standard deviation.

\**P* < 0.05, Student t test



**Supplementary Table 10.** Logistic regression for predictors of dependent functionalstatus (modified Rankin Scale score  $\geq 3$ ) in patients with small-artery occlusion

following the 30-day period.

| Variables                               | Univariate Logistic Regression |                | Multivariate Logistic Regression |                |
|-----------------------------------------|--------------------------------|----------------|----------------------------------|----------------|
|                                         | OR (95% CI)                    | <i>P</i> value | OR (95% CI)                      | <i>P</i> value |
| Age                                     | 1.01 (0.99-1.03)               | 0.465          |                                  |                |
| Male                                    | 0.90 (0.60-1.35)               | 0.607          |                                  |                |
| Hypertension                            | 1.47 (0.84-2.56)               | 0.177          |                                  |                |
| Diabetes mellitus                       | 1.45 (0.97-2.15)               | 0.069*         |                                  |                |
| Hyperlipidemia                          | 0.88 (0.59-1.32)               | 0.532          |                                  |                |
| CAD                                     | 0.72 (0.36-1.44)               | 0.355          |                                  |                |
| CHF                                     | 1.89 (1.76-4.65)               | 0.169          |                                  |                |
| Atrial fibrillation                     | 0.99 (0.27-3.72)               | 0.991          |                                  |                |
| Nephrotic syndrome                      | 6.98 (4.45-10.95)              | <0.001*        | 8.02 (3.94-16.32)                | <0.001†        |
| Hyperuricemia                           | 0.82 (0.43-1.58)               | 0.560          |                                  |                |
| Pneumonia                               | 3.19 (1.44-7.07)               | 0.004*         |                                  |                |
| WBC count > 10000<br>1000/ $\mu$ L      | 1.19 (0.69-2.05)               | 0.538          |                                  |                |
| Hemoglobin < 12 g/dL                    | 3.53 (2.25-5.54)               | <0.001*        |                                  |                |
| eGFR < 60 mL/min/1.73<br>m <sup>2</sup> | 5.07 (3.06-8.41)               | <0.001*        | 0.66 (0.29-1.53)                 | 0.333          |
| Sodium < 135 mmol/L                     | 1.67 (0.85-3.31)               | 0.139          |                                  |                |
| hs-CRP > 3 mg/L                         | 1.92 (1.18-3.13)               | 0.009*         | 1.85 (1.06-3.21)                 | 0.030†         |

OR = odds ratio; CI = confidence interval; CAD = coronary artery disease; CHF =

congestive heart failure; WBC = white blood cell; eGFR = estimated glomerular

filtration rate; hs-CRP = high-sensitivity C-reactive protein.

\**P* < 0.1 for the univariate logistic regression, and †*P* < 0.05 for the stepwise

multivariate logistic regression.

**Supplementary Table 11.** Logistic regression for predictors of dependent functional status (modified Rankin Scale score  $\geq 3$ ) in patients with stroke of undetermined etiology following the 30-day period.

| Variables                               | Univariate Logistic Regression |                | Multivariate Logistic Regression |                |
|-----------------------------------------|--------------------------------|----------------|----------------------------------|----------------|
|                                         | OR (95% CI)                    | <i>P</i> value | OR (95% CI)                      | <i>P</i> value |
| Age                                     | 1.01 (1.00-1.03)               | 0.096*         |                                  |                |
| Male                                    | 0.72 (0.49-1.06)               | 0.093*         |                                  |                |
| Hypertension                            | 0.89 (0.60-1.32)               | 0.552          |                                  |                |
| Diabetes mellitus                       | 1.06 (0.73-1.54)               | 0.748          |                                  |                |
| Hyperlipidemia                          | 0.69 (0.48-1.00)               | 0.052*         |                                  |                |
| CAD                                     | 1.60 (0.82-3.12)               | 0.165          |                                  |                |
| CHF                                     | 3.93 (1.32-11.68)              | 0.014*         |                                  |                |
| Atrial fibrillation                     | 2.21 (0.92-5.33)               | 0.077*         |                                  |                |
| Nephrotic syndrome                      | 2.66 (1.23-5.73)               | 0.013*         | 2.47 (1.06-5.76)                 | 0.037†         |
| Hyperuricemia                           | 0.75 (0.42-1.34)               | 0.329          |                                  |                |
| TACS                                    | 31.65 (4.30-232.72)            | 0.001*         | 17.55 (2.30-133.96)              | 0.006†         |
| Pneumonia                               | 7.87 (3.83-16.16)              | <0.001*        | 4.12 (1.89-9.00)                 | <0.001†        |
| WBC count > 10000<br>1000/ $\mu$ L      | 2.03 (1.25-3.30)               | 0.004*         |                                  |                |
| Hemoglobin < 12 g/dL                    | 2.10 (1.31-3.37)               | 0.002*         |                                  |                |
| eGFR < 60 mL/min/1.73<br>m <sup>2</sup> | 1.97 (0.81-4.82)               | 0.135          |                                  |                |
| Sodium < 135 mmol/L                     | 2.47 (1.22-5.00)               | 0.012*         |                                  |                |
| hs-CRP > 3 mg/L                         | 3.30 (2.16-5.04)               | <0.001*        | 2.19 (1.36-3.50)                 | 0.001†         |

OR = odds ratio; CI = confidence interval; CAD = coronary artery disease; CHF = congestive heart failure; TACS = total anterior circulation syndrome; WBC = white blood cell; eGFR = estimated glomerular filtration rate; hs-CRP = high-sensitivity C-reactive protein.

\**P* < 0.1 for the univariate logistic regression, and †*P* < 0.05 for the stepwise multivariate logistic regression.

**Supplementary Table 12.** Treatment, complication and clinical outcomes of ischemic stroke patients, with and without nephrotic syndrome.

|                             | Large-artery atherosclerosis |               | Cardioembolism    |               | Small-artery occlusion |               | Stroke of other determined etiology |              | Stroke of undetermined etiology |               |
|-----------------------------|------------------------------|---------------|-------------------|---------------|------------------------|---------------|-------------------------------------|--------------|---------------------------------|---------------|
|                             | NS (n=43)                    | No NS (n=216) | NS (n=23)         | No NS (n=259) | NS (n=118)             | No NS (n=419) | NS (n=11)                           | No NS (n=27) | NS (n=38)                       | No NS (n=437) |
| Treatment                   |                              |               |                   |               |                        |               |                                     |              |                                 |               |
| Intra-venous thrombolysis   | 0 (0%)                       | 13 (6%)       | 1 (4.3%)          | 34 (13.1%)    | 2 (1.7%)               | 11 (2.6%)     | 1 (9.1%)                            | 0 (0%)       | 0 (0%)                          | 16 (3.7%)     |
| OR (95% CI)                 |                              |               | 0.30 (0.04-2.29)  |               | 0.64 (0.14-2.90)       |               |                                     |              |                                 |               |
| <i>P</i> value              | 0.088                        |               | 0.188             |               | 0.425                  |               | 0.289                               |              | 0.247                           |               |
| Intra-arterial thrombectomy | 0 (0%)                       | 1 (0.5%)      | 0 (0%)            | 1 (0.4%)      | 0 (0%)                 | 0 (0%)        | 0 (0%)                              | 0 (0%)       | 0 (0%)                          | 0 (0%)        |
| OR (95% CI)                 |                              |               | 0.918             |               |                        |               |                                     |              |                                 |               |
| <i>P</i> value              | 0.833                        |               | 0.918             |               |                        |               |                                     |              |                                 |               |
| Warfarin                    | 3 (7.0%)                     | 12 (5.6%)     | 4 (17.4%)         | 19 (7.3%)     | 3 (2.5%)               | 2 (0.5%)      | 2 (18.2%)                           | 1 (3.7%)     | 1 (2.6%)                        | 13 (3.0%)     |
| OR (95% CI)                 | 1.27 (0.34-4.70)             |               | 2.65 (0.82-8.58)  |               | 5.40 (0.89-32.70)      |               | 5.78 (0.47-71.62)                   |              | 0.85 (0.11-6.71)                |               |
| <i>P</i> value              | 0.471                        |               | 0.105             |               | 0.074                  |               | 0.196                               |              | 0.677                           |               |
| P2Y12 inhibitors            | 16 (37.2%)                   | 67 (31.0%)    | 6 (26.1%)         | 32 (12.4%)    | 25 (21.2%)             | 64 (15.3%)    | 1 (9.1%)                            | 2 (7.4%)     | 9 (23.7%)                       | 97 (22.2%)    |
| OR (95% CI)                 | 1.31 (0.66-2.59)             |               | 2.49 (0.92-6.79)  |               | 1.48 (0.88-2.48)       |               | 1.25 (0.10-15.38)                   |              | 1.05 (0.48-2.28)                |               |
| <i>P</i> value              | 0.273                        |               | 0.072             |               | 0.090                  |               | 0.653                               |              | 0.523                           |               |
| Heparin in acute stage      | 4 (9.3%)                     | 12 (5.6%)     | 1 (4.3%)          | 3 (1.2%)      | 4 (3.4%)               | 1 (0.2%)      | 1 (9.1%)                            | 0 (0%)       | 0 (0%)                          | 9 (2.1%)      |
| OR (95% CI)                 | 1.74 (0.53-5.66)             |               | 3.86 (0.39-38.72) |               | 14.56 (1.61-131.56)    |               |                                     |              |                                 |               |
| <i>P</i> value              | 0.267                        |               | 0.291             |               | 0.009+                 |               | 0.289                               |              | 0.459                           |               |

|                                          |                  |             |                  |             |                   |             |                  |            |                  |             |
|------------------------------------------|------------------|-------------|------------------|-------------|-------------------|-------------|------------------|------------|------------------|-------------|
| Aspirin                                  | 25 (58.1%)       | 130 (60.2%) | 10 (43.5%)       | 54 (20.8%)  | 82 (69.5%)        | 357 (85.2%) | 5 (45.5%)        | 16 (59.3%) | 23 (60.5%)       | 292 (66.8%) |
| OR (95% CI)                              | 0.91 (0.47-1.77) |             | 2.91 (1.21-6.99) |             | 0.38 (0.23-0.61)  |             | 0.57 (0.14-2.36) |            | 0.70 (0.36-1.37) |             |
| <i>P</i> value                           | 0.452            |             | 0.018†           |             | <0.001†           |             | 0.337            |            | 0.195            |             |
| NOACs                                    | 0 (0%)           | 3 (1.4%)    | 1 (4.3%)         | 128 (49.4%) | 0 (0%)            | 4 (1.0%)    | 0 (0%)           | 0 (0%)     | 0 (0%)           | 11 (2.5%)   |
| OR (95% CI)                              |                  |             | 0.05 (0.01-0.35) |             |                   |             |                  |            |                  |             |
| <i>P</i> value                           | 0.577            |             | <0.001†          |             | 0.367             |             |                  |            | 0.385            |             |
| Statins                                  | 17 (39.5%)       | 118 (54.6%) | 4 (17.4%)        | 74 (28.6%)  | 44 (37.3%)        | 209 (49.9%) | 2 (18.2%)        | 7 (25.9%)  | 15 (39.5%)       | 185 (42.3%) |
| OR (95% CI)                              | 0.54 (0.28-1.05) |             | 0.52 (0.17-1.59) |             | 0.59 (0.39-0.90)  |             | 0.64 (0.11-3.68) |            | 0.85 (0.43-1.66) |             |
| <i>P</i> value                           | 0.047†           |             | 0.181            |             | 0.008†            |             | 0.478            |            | 0.376            |             |
| Length of stay in acute care unit (days) | 18.81±16.59      | 16.30±11.01 | 22.74±19.34      | 17.72±12.99 | 11.02±8.44        | 8.17±4.25   | 20.00±12.58      | 14.33±9.24 | 15.15±9.12       | 14.41±9.90  |
| <i>P</i> value                           | 0.215            |             | 0.258            |             | 0.001*            |             | 0.440            |            | 0.653            |             |
| Stroke in evolution                      | 10 (23.3%)       | 61 (28.2%)  | 5 (21.7%)        | 56 (21.6%)  | 7 (5.9%)          | 7 (1.7%)    | 3 (27.3%)        | 6 (22.2%)  | 4 (10.5%)        | 51 (11.7%)  |
| OR (95% CI)                              | 0.77 (0.36-1.65) |             | 1.00 (0.36-2.82) |             | 3.69 (1.27-10.73) |             | 1.31 (0.26-6.55) |            | 0.86(0.29-2.52)  |             |
| <i>P</i> value                           | 0.314            |             | 0.587            |             | 0.019†            |             | 0.522            |            | 0.518            |             |
| Complication at admission                |                  |             |                  |             |                   |             |                  |            |                  |             |
| UTI                                      | 5 (11.6%)        | 32 (14.8%)  | 6 (26.1%)        | 63 (24.3%)  | 12 (10.2%)        | 23 (5.5%)   | 1 (9.1%)         | 4 (14.8%)  | 5 (13.2%)        | 62 (14.2%)  |
| OR (95% CI)                              | 0.75 (0.28-2.06) |             | 1.09 (0.41-2.89) |             | 1.93 (0.93-4.02)  |             | 0.58 (0.06-5.81) |            | 0.89 (0.33-2.35) |             |
| <i>P</i> value                           | 0.389            |             | 0.515            |             | 0.061             |             | 0.545            |            | 0.517            |             |
| Pneumonia                                | 12 (27.9%)       | 61 (28.2%)  | 5 (21.7%)        | 96 (37.1%)  | 11 (9.3%)         | 15 (3.6%)   | 1 (9.1%)         | 5 (18.5%)  | 11 (28.9%)       | 71 (16.2%)  |
| OR (95% CI)                              | 0.98 (0.47-2.03) |             | 0.47 (0.17-1.30) |             | 2.75 (1.23-6.16)  |             | 0.44 (0.05-4.27) |            | 2.01 (0.96-4.23) |             |
| <i>P</i> value                           | 0.556            |             | 0.102            |             | 0.014†            |             | 0.429            |            | 0.054            |             |
| GI bleeding                              | 5 (11.6%)        | 31 (14.4%)  | 2 (8.7%)         | 52 (20.1%)  | 5 (4.2%)          | 5 (1.2%)    | 1 (9.1%)         | 3 (11.1%)  | 8 (21.1%)        | 42 (9.6%)   |
| OR (95% CI)                              | 0.78 (0.29-2.14) |             | 0.38 (0.09-1.66) |             | 3.64 (1.04-12.78) |             | 0.80 (0.07-8.65) |            | 2.41 (1.04-5.59) |             |
| <i>P</i> value                           | 0.420            |             | 0.142            |             | 0.047†            |             | 0.674            |            | 0.041*           |             |



|                          |                   |            |                   |            |                  |            |                  |            |                   |            |
|--------------------------|-------------------|------------|-------------------|------------|------------------|------------|------------------|------------|-------------------|------------|
| Other infection          | 7 (16.3%)         | 11 (5.1%)  | 1 (4.3%)          | 20 (7.7%)  | 5 (4.2%)         | 12 (2.9%)  | 1 (9.1%)         | 3 (11.1%)  | 3 (7.9%)          | 20 (4.6%)  |
| OR (95% CI)              | 3.61 (1.31-9.92)  |            | 0.54 (0.07-4.22)  |            | 1.49 (0.51-4.32) |            | 0.80 (0.07-8.65) |            | 1.73 (0.49-6.10)  |            |
| <i>P</i> value           | 0.017+            |            | 0.470             |            | 0.315            |            | 0.674            |            | 0.291             |            |
| Acute coronary syndrome  | 1 (2.3%)          | 5 (2.3%)   | 1 (4.3%)          | 7 (2.7%)   | 0 (0%)           | 1 (0.2%)   | 0 (0%)           | 2 (7.4%)   | 1 (2.6%)          | 4 (0.9%)   |
| OR (95% CI)              | 1.00 (0.11-8.78)  |            | 1.63 (0.19-13.86) |            |                  |            |                  |            | 2.84 (0.31-26.01) |            |
| <i>P</i> value           | 0.738             |            | 0.500             |            | 0.779            |            | 0.499            |            | 0.350             |            |
| Venous thromboembolism   | 1 (2.3%)          | 2 (0.9%)   | 1 (4.3%)          | 2 (0.8%)   | 0 (0%)           | 1 (0.2%)   | 0 (0%)           | 0 (0%)     | 0 (0%)            | 0 (0%)     |
| OR (95% CI)              | 2.54 (0.23-28.61) |            | 5.82 (0.51-66.73) |            |                  |            |                  |            |                   |            |
| <i>P</i> value           | 0.423             |            | 0.227             |            | 0.779            |            |                  |            |                   |            |
| Pulmonary edema          | 4 (9.3%)          | 4 (1.9%)   | 3 (13%)           | 16 (6.2%)  | 4 (3.4%)         | 0 (0%)     | 0 (0%)           | 1 (3.7%)   | 2 (5.3%)          | 4 (0.9%)   |
| OR (95% CI)              | 5.41 (1.30-22.55) |            | 2.27 (0.61-8.45)  |            |                  |            |                  |            | 5.82 (1.03-32.86) |            |
| <i>P</i> value           | 0.028+            |            | 0.195             |            | 0.002+           |            | 0.711            |            | 0.080             |            |
| Glasgow coma scale score |                   |            |                   |            |                  |            |                  |            |                   |            |
| Upon admission           | 15 (15-15)        | 15 (11-15) | 15 (13-15)        | 14 (11-15) | 15 (15-15)       | 15 (15-15) | 15 (15-15)       | 15 (15-15) | 15 (15-15)        | 15 (15-15) |
| <i>P</i> value           | 0.241             |            | 0.217             |            | 0.155            |            | 0.462            |            | 0.515             |            |
| Upon discharge           | 15 (15-15)        | 15 (11-15) | 15 (13-15)        | 14 (10-15) | 15 (15-15)       | 15 (15-15) | 15 (15-15)       | 15 (11-15) | 15 (15-15)        | 15 (11-15) |
| <i>P</i> value           | 0.255             |            | 0.100             |            | 0.906            |            | 0.222            |            | 0.207             |            |
| NIHSS score              |                   |            |                   |            |                  |            |                  |            |                   |            |
| Upon admission           | 6 (3-13)          | 6 (3-13)   | 12 (10-15)        | 10 (4-18)  | 6 (3-8)          | 3 (2-4)    | 10 (6-14)        | 4 (3-12)   | 11 (3-26)         | 5 (3-9)    |
| <i>P</i> value           | 0.834             |            | 0.461             |            | 0.094            |            | 0.418            |            | 0.476             |            |
| Upon discharge           | 6 (3-15)          | 6 (3-16)   | 12 (9-18)         | 9 (4-20)   | 4 (3-8)          | 3 (2-4)    | 14 (8-20)        | 5 (3-18)   | 12 (3-26)         | 5 (3-10)   |
| <i>P</i> value           | 0.785             |            | 0.555             |            | 0.233            |            | 0.319            |            | 0.358             |            |
| mRS score                |                   |            |                   |            |                  |            |                  |            |                   |            |

|                                 |                  |             |                  |             |                   |            |                  |            |                  |             |
|---------------------------------|------------------|-------------|------------------|-------------|-------------------|------------|------------------|------------|------------------|-------------|
| Upon admission                  | 4 (3-5)          | 3 (2-5)     | 3 (2-3)          | 5 (2-5)     | 3 (2-3)           | 1 (1-2)    | 2 (2-4)          | 2 (1-5)    | 3 (3-5)          | 3 (2-4)     |
| <i>P</i> value                  | 0.043*           |             | 0.106            |             | <0.001*           |            | 0.868            |            | 0.112            |             |
| Upon discharge                  | 4 (3-5)          | 3 (2-5)     | 3 (3-4)          | 3 (3-5)     | 3 (2-3)           | 1 (1-2)    | 2 (2-4)          | 2 (1-5)    | 3 (3-4)          | 3 (2-4)     |
| <i>P</i> value                  | 1.171            |             | 0.274            |             | <0.001*           |            | 0.855            |            | 0.115            |             |
| Outcomes                        |                  |             |                  |             |                   |            |                  |            |                  |             |
| Death within 30 days            | 4 (9.3%)         | 18 (8.3%)   | 1 (4.3%)         | 27 (10.4%)  | 2 (1.7%)          | 1 (0.2%)   | 0 (0%)           | 6 (22.2%)  | 1 (2.6%)         | 12 (2.7%)   |
| OR (95% CI)                     | 1.12 (0.36-3.50) |             | 0.39 (0.05-3.00) |             | 7.16 (0.24-79.61) |            |                  |            | 0.93 (0.12-7.33) |             |
| <i>P</i> value                  | 0.517            |             | 0.305            |             | 0.124             |            | 0.107            |            | 0.709            |             |
| Recurrent stroke within 30 days | 0 (0%)           | 1 (0.5%)    | 0 (0%)           | 2 (0.8%)    | 0 (0%)            | 2 (0.5%)   | 0 (0%)           | 0 (0%)     | 0 (0%)           | 2 (0.5%)    |
| <i>P</i> value                  | 0.833            |             | 0.843            |             | 0.607             |            |                  |            | 0.846            |             |
| mRS score $\geq 3$              | 33 (76.7%)       | 133 (61.6%) | 18 (78.3%)       | 182 (70.3%) | 68 (57.6%)        | 67 (16.0%) | 3 (27.3%)        | 12 (44.4%) | 30 (78.9%)       | 242 (55.4%) |
| OR (95% CI)                     | 2.04 (0.95-4.35) |             | 1.50 (0.54-4.20) |             | 7.08 (4.52-11.10) |            | 0.47 (0.10-2.16) |            | 2.66 (1.23-5.73) |             |
| <i>P</i> value                  | 0.043†           |             | 0.301            |             | <0.001†           |            | 0.272            |            | 0.007†           |             |
| Adjusted OR (95% CI)            | 2.03 (0.78-5.28) |             |                  |             | 7.85 (4.28-14.40) |            |                  |            | 2.47 (1.06-5.76) |             |
| Adjusted <i>P</i> value         | 0.148            |             |                  |             | <0.001‡           |            |                  |            | 0.037‡           |             |

NS = nephrotic syndrome; OR = odds ratio; CI = confidence interval; NOACs = non-vitamin K antagonist oral anticoagulants; UTI = urinary tract infection; GI = gastrointestinal; NIHSS = national institute of health stroke scale; mRS = modified Rankin scale.

Data are presented as mean  $\pm$  standard deviation, median (interquartile range) or n (%).

\* $P < 0.05$ , Student *t* test or Mann-Whitney U test; †  $P < 0.05$ , Chi-square test; ‡  $P < 0.05$ , adjusted *P* value using multivariate logistic regression analysis.
